# Supplementary material for: A Design Space for Context-Sensitive User Interfaces.
Source: Royal Society of Chemistry journal article supplement (doi:10.1039/d3na00389b), 2005-01-01
Supplement: d3na00389b1.pdf [file d3na00389b1.pdf]

Electronic Supplementary Information for

**Two-dimensional self-assembly and co-assembly of two  
tetracarboxylic acid derivatives investigated by STM**

Xuan Peng,<sup>a, d, ξ</sup> Linlin Gan,<sup>a, c, ξ</sup> Wenchao Zhai,<sup>d</sup> Xiaoling Chen,<sup>d</sup> Ke Deng,<sup>\*a</sup> Wubiao Duan,<sup>\*c</sup> Wei Li,<sup>\*d</sup> Qingdao Zeng<sup>\*a, b</sup>

- a. CAS key Laboratory of Standardization and Measurement for Nanotechnology, CAS Center for Excellence in Nanoscience, National Center for Nanoscience and Technology (NCNST), Beijing 100190, China.*
- b. Center of Materials Science and Optoelectronics Engineering, University of Chinese Academy of Sciences, Beijing 100049, China.*
- c. Department of Chemistry, School of Science, Beijing Jiaotong University, Beijing 100044, China.*
- d. School of Science, Nanchang Institute of Technology, Nanchang 330099, China.*

\*Corresponding author E-mail: [kdeng@nanoctr.cn](mailto:kdeng@nanoctr.cn); [liweiding@nit.edu.cn](mailto:liweiding@nit.edu.cn); [wbduan@bjtu.edu.cn](mailto:wbduan@bjtu.edu.cn); [zengqd@nanoctr.cn](mailto:zengqd@nanoctr.cn).

<sup>ξ</sup>Xuan Peng and Linlin Gan contributed to this work equally.

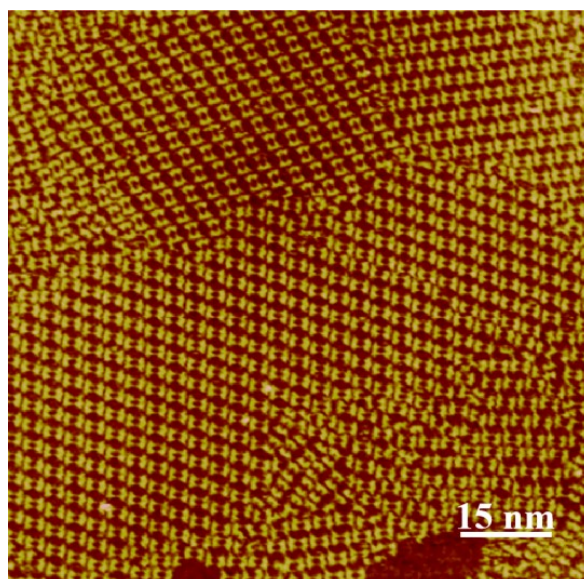

**Fig. S1** Large-scale STM image of H<sub>4</sub>BDETP's self-assembled nanostructure at the 1-heptanoic acid/HOPG interface with the tunneling conditions of  $I_{set} = 216.7$  pA,  $V_{bias} = 707.4$  mV.

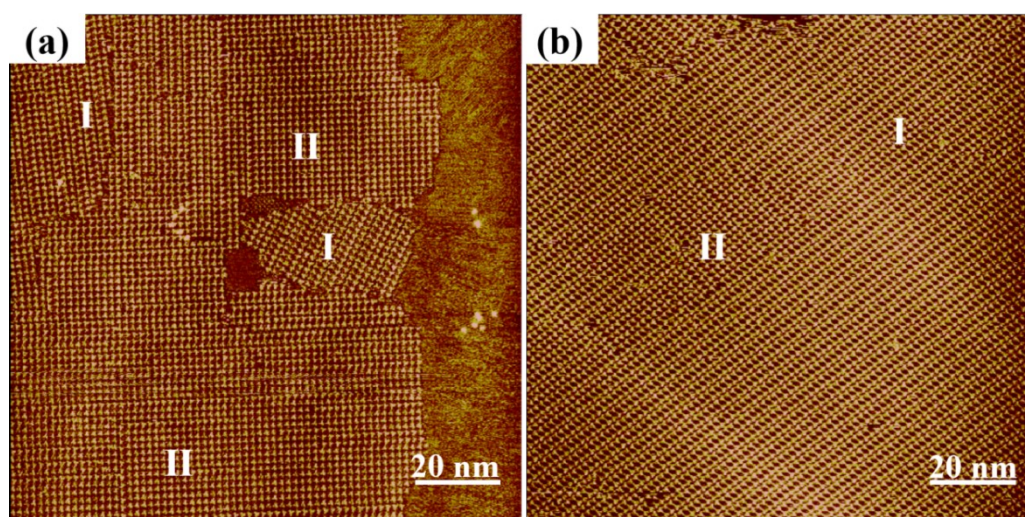

**Fig. S2** (a), (b) Large-scale STM images of H<sub>4</sub>BTB's two self-assembled nanostructure (lamellar nanostructure in domain I and tetragonal nanostructure in domain II) at the 1-heptanoic acid/HOPG interface, both the tunneling conditions were:  $I_{set} = 363.2$  pA,  $V_{bias} = 668.0$  mV.



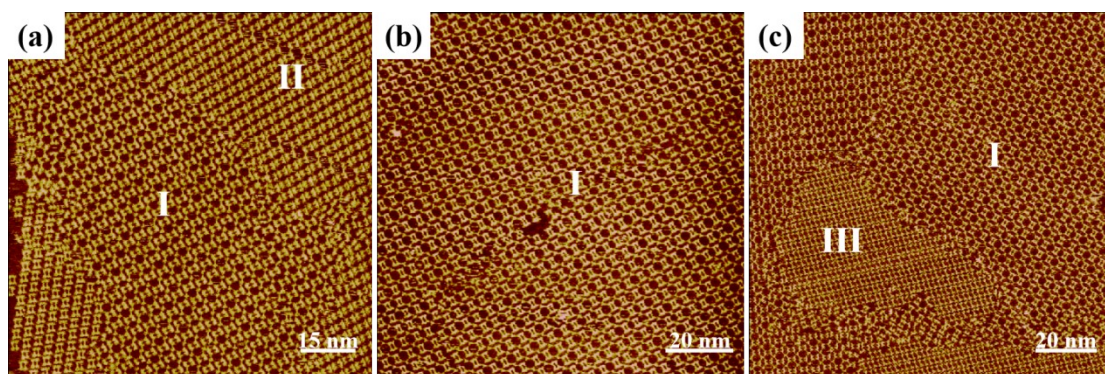

**Fig. S3** Large-scale STM images of two-component system prepared by dropping  $H_4BTB$  to pre-assembled  $H_4BDETP$  with different molar ratios: (a)  $H_4BDETP:H_4BTB > 2:1$ ,  $I_{set} = 219.7$  pA,  $V_{bias} = 655.2$  mV; (b)  $H_4BDETP:H_4BTB = 2:1$ ,  $I_{set} = 265.5$  pA,  $V_{bias} = 754.4$  mV; (c)  $H_4BDETP:H_4BTB < 2:1$ ,  $I_{set} = 174.0$  pA,  $V_{bias} = 551.5$  mV. (Domain I:  $H_4BDETP/H_4BTB$  co-assembly structure. Domain II: self-assembly structure of  $H_4BDETP$ . Domain III: self-assembly structure of  $H_4BTB$ )

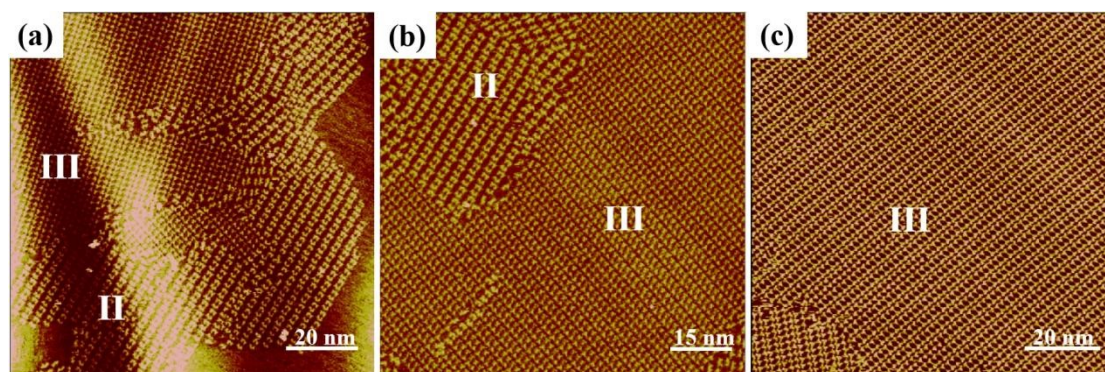

**Fig. S4** Large-scale STM images of assembled structures prepared by dropping  $H_4BDETP$  to pre-assembled  $H_4BTB$  with different molar ratios: (a)  $H_4BDETP:H_4BTB > 2:1$ ,  $I_{set} = 296.0$  pA,  $V_{bias} = 578.9$  mV; (b)  $H_4BDETP:H_4BTB = 2:1$ ,  $I_{set} = 296.0$  pA,  $V_{bias} = 578.9$  mV; (c)  $H_4BDETP:H_4BTB < 2:1$ ,  $I_{set} = 299.8$  pA,  $V_{bias} = 699.8$  mV. (Domain II: self-assembly structure of  $H_4BDETP$ . Domain III: self-assembly structure of  $H_4BTB$ )

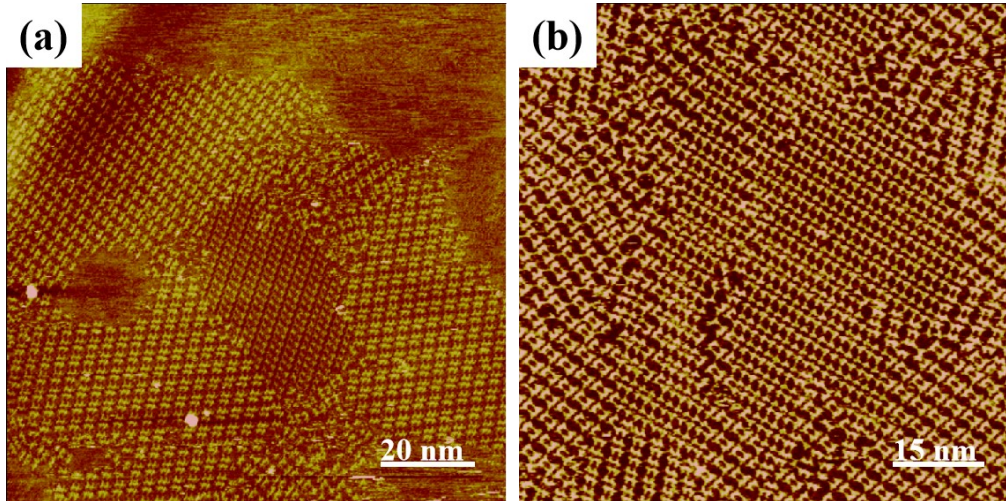

**Fig. S5** Large-scale STM images of two-component system prepared by pre-mixing  $H_4BTB$  and  $H_4BDETP$  solution: (a)  $I_{set} = 241.1$  pA,  $V_{bias} = 846.3$  mV , (b)  $I_{set} = 335.7$  pA,  $V_{bias} = 660.4$  mV . The concentration of  $H_4BTB$  increased from (a) to (b).
